# Supplementary material for: Detection of Copy Number Variants Reveals Association of Cilia Genes with Neural Tube Defects
Source: PLoS One. 2013 Jan 17;8(1):e54492. doi: 10.1371/journal.pone.0054492 (PMC3547935; doi:10.1371/journal.pone.0054492)
Supplement: Table S2 — Different categories of non-DGV CNVs and non-DGV genic CNVs in the two groups. (XLS) [file pone.0054492.s003.xls]

## Sheet: Table S2
Supplementary Table 2 Different categories of non-DGV CNVs and non-DGV genic CNVs in the two groups
	NTDs	Control	P value
Number of samples	85	75
Size of non-DGV CNVs (Kb)	272	205	0.208*
Size of non-DGV genic CNVs	262	187	0.126*
Grouping non-DGV CNVs with different size
50-100kb	9	9
100-250kb	23	10
250-500kb	13	5
>500kb	10	2	0.383**
Grouping non-DGV genic CNVs with different size
50-100kb	8	7
100-250kb	16	7
250-500kb	9	4
>500kb	7	1	0.552**
*Student’s t test for two groups, two-tail, ** Wilcoxon rank-sum tests, two-tail
