# Supplementary material for: Detection of Copy Number Variants Reveals Association of Cilia Genes with Neural Tube Defects
Source: PLoS One. 2013 Jan 17;8(1):e54492. doi: 10.1371/journal.pone.0054492 (PMC3547935; doi:10.1371/journal.pone.0054492)
Supplement: Table S3 — Gene list compassed in non-DGV CNVs from NTD samples. (XLS) [file pone.0054492.s004.xls]

## Sheet: Table S3
Supplementary Table 3: Gene list compassed in non-DGV CNVs from NTD samples
Log Ratio	Symbol	Entrez Gene Name	Location	Type(s)
0.564	ACTR3B	ARP3 actin-related protein 3 homolog B (yeast)	unknown	other
0.462	ADAP1	ArfGAP with dual PH domains 1	Nucleus	other
0.675	ADSL	adenylosuccinate lyase	Cytoplasm	enzyme
0.354	AGAP2	ArfGAP with GTPase domain, ankyrin repeat and PH domain 2	Nucleus	enzyme
0.554	AP1S1	adaptor-related protein complex 1, sigma 1 subunit	Cytoplasm	transporter
-0.421	APLF	aprataxin and PNKP like factor	Cytoplasm	other
0.574	ATOH8	atonal homolog 8 (Drosophila)	unknown	other
-0.583	ATP5G1	ATP synthase, H+ transporting, mitochondrial F0 complex, subunit C1 (subunit 9)	Cytoplasm	transporter
0.354	AVIL	advillin	Cytoplasm	other
-0.603	AVP	arginine vasopressin	Extracellular Space	other
0.354	B4GALNT1	beta-1,4-N-acetyl-galactosaminyl transferase 1	Cytoplasm	enzyme
0.565	BRE	brain and reproductive organ-expressed (TNFRSF1A modulator)	Cytoplasm	other
-0.502	C13ORF23	chromosome 13 open reading frame 23	unknown	other
-1.036	C16ORF61	chromosome 16 open reading frame 61	unknown	other
-0.271	C6ORF147	chromosome 6 open reading frame 147	unknown	other
-0.271	C6ORF150	chromosome 6 open reading frame 150	unknown	other
-0.271	C6ORF221	chromosome 6 open reading frame 221	unknown	other
0.462	C7ORF20	chromosome 7 open reading frame 20	unknown	other
0.554	C7ORF52	chromosome 7 open reading frame 52	unknown	other
-0.541	C19ORF44	chromosome 19 open reading frame 44	unknown	other
-0.583	CALCOCO2	calcium binding and coiled-coil domain 2	Nucleus	other
-0.541	CALR3	calreticulin 3	Cytoplasm	other
0.459	CAMK1D	calcium/calmodulin-dependent protein kinase ID	Cytoplasm	kinase
0.565	CCDC121	coiled-coil domain containing 121	unknown	other
-0.271	CD109	CD109 molecule	Plasma Membrane	other
0.459	CDC123	cell division cycle 123 homolog (S. cerevisiae)	Cytoplasm	other
0.786	CDC16	cell division cycle 16 homolog (S. cerevisiae)	Nucleus	other
-1.036	CDYL2 (includes EG:124359)	chromodomain protein, Y-like 2	Nucleus	other
-1.036	CENPN	centromere protein N	unknown	other
0.554	CLDN15	claudin 15	Plasma Membrane	other
0.462	COX19	COX19 cytochrome c oxidase assembly homolog (S. cerevisiae)	unknown	other
0.354	CTDSP2	CTD (carboxy-terminal domain, RNA polymerase II, polypeptide A) small phosphatase 2	Cytoplasm	phosphatase
0.600	CTNNA3	catenin (cadherin-associated protein), alpha 3	Plasma Membrane	other
0.554	CUX1	cut-like homeobox 1	Nucleus	transcription regulator
0.354	CYP27B1	cytochrome P450, family 27, subfamily B, polypeptide 1	Cytoplasm	enzyme
-3.129	DCAF12L2	DDB1 and CUL4 associated factor 12-like 2	unknown	other
-0.271	DDX43	DEAD (Asp-Glu-Ala-Asp) box polypeptide 43	unknown	enzyme
-0.283	DDX46	DEAD (Asp-Glu-Ala-Asp) box polypeptide 46	Nucleus	enzyme
-0.279	DENND2A	DENN/MADD domain containing 2A	unknown	other
-1.134	DEPDC6 (includes EG:64798)	DEP domain containing 6	unknown	other
0.459	DHTKD1	dehydrogenase E1 and transketolase domain containing 1	unknown	enzyme
-0.271	DPPA5	developmental pluripotency associated 5	unknown	other
-1.134	DSCC1	defective in sister chromatid cohesion 1 homolog (S. cerevisiae)	unknown	other
0.354	DTX3	deltex homolog 3 (Drosophila)	Cytoplasm	other
-0.271	EEF1A1	eukaryotic translation elongation factor 1 alpha 1	Cytoplasm	translation regulator
0.554	EMID2	EMI domain containing 2	Extracellular Space	other
-0.541	EPS15L1	epidermal growth factor receptor pathway substrate 15-like 1	Plasma Membrane	other
-0.259	EPS8L1	EPS8-like 1	unknown	other
0.354	FAM119B	family with sequence similarity 119, member B	unknown	other
-0.421	FBXO48	F-box protein 48	unknown	other
-0.259	FCAR	Fc fragment of IgA, receptor for	Plasma Membrane	other
0.554	FIS1	fission 1 (mitochondrial outer membrane) homolog (S. cerevisiae)	Cytoplasm	other
0.735	GLIS3	GLIS family zinc finger 3	Nucleus	transcription regulator
0.574	GNLY	granulysin	Cytoplasm	other
-0.259	GP6	glycoprotein VI (platelet)	Plasma Membrane	transmembrane receptor
0.614	GPC5	glypican 5	Plasma Membrane	other
0.565	GPN1	GPN-loop GTPase 1	Nucleus	transcription regulator
-0.447	INTS6	integrator complex subunit 6	Nucleus	enzyme
-0.279	JHDM1D	jumonji C domain containing histone demethylase 1 homolog D (S. cerevisiae)	unknown	other
0.522	KCNQ5	potassium voltage-gated channel, KQT-like subfamily, member 5	Plasma Membrane	ion channel
-0.271	KHDC1	KH homology domain containing 1	unknown	other
-0.846	KIAA1586	KIAA1586	unknown	other
0.613	KIAA1671	KIAA1671	unknown	other
-0.872	KRTAP11-1	keratin associated protein 11-1	unknown	other
-0.872	KRTAP21-1	keratin associated protein 21-1	unknown	other
-0.872	KRTAP21-2	keratin associated protein 21-2	unknown	other
-0.872	KRTAP7-1 (includes EG:337878)	keratin associated protein 7-1 (gene/pseudogene)	unknown	other
-0.872	KRTAP8-1	keratin associated protein 8-1	unknown	other
-0.841	LEFTY1	left-right determination factor 1	Extracellular Space	growth factor
0.587	LMO1	LIM domain only 1 (rhombotin 1)	Nucleus	transcription regulator
0.354	MARCH9 (includes EG:92979)	membrane-associated ring finger (C3HC4) 9	unknown	other
0.354	METTL1	methyltransferase like 1	unknown	enzyme
0.718	MGAM	maltase-glucoamylase (alpha-glucosidase)	Cytoplasm	enzyme
-0.279	MKRN1	makorin ring finger protein 1	unknown	other
0.554	MOGAT3	monoacylglycerol O-acyltransferase 3	unknown	enzyme
0.565	MRPL33	mitochondrial ribosomal protein L33	unknown	other
-0.271	MTO1	mitochondrial translation optimization 1 homolog (S. cerevisiae)	Cytoplasm	enzyme
0.554	MUC17	mucin 17, cell surface associated	unknown	other
0.550	MYCBP2	MYC binding protein 2	Nucleus	enzyme
0.554	MYL10	myosin, light chain 10, regulatory	Cytoplasm	other
-1.004	NCKAP5	NCK-associated protein 5	unknown	other
-0.259	NCR1	natural cytotoxicity triggering receptor 1	Plasma Membrane	other
-0.784	NDUFAF2	NADH dehydrogenase (ubiquinone) 1 alpha subcomplex, assembly factor 2	Cytoplasm	other
-0.259	NLRP2	NLR family, pyrin domain containing 2	Nucleus	other
-0.259	NLRP7	NLR family, pyrin domain containing 7	unknown	other
-0.880	NRG3	neuregulin 3	Extracellular Space	growth factor
0.459	NUDT5	nudix (nucleoside diphosphate linked moiety X)-type motif 5	Cytoplasm	phosphatase
-0.271	OOEP	oocyte expressed protein homolog (dog)	unknown	other
-1.031	OR9K2	olfactory receptor, family 9, subfamily K, member 2	Plasma Membrane	G-protein coupled receptor
0.354	OS9	osteosarcoma amplified 9, endoplasmic reticulum lectin	Nucleus	other
-0.957	PARD3	par-3 partitioning defective 3 homolog (C. elegans)	Plasma Membrane	other
0.580	PARD6G	par-6 partitioning defective 6 homolog gamma (C. elegans)	Plasma Membrane	other
-0.279	PARP12	poly (ADP-ribose) polymerase family, member 12	Nucleus	other
0.554	PLOD3	procollagen-lysine, 2-oxoglutarate 5-dioxygenase 3	Cytoplasm	enzyme
0.330	POLG	polymerase (DNA directed), gamma	Cytoplasm	enzyme
0.920	PRKX	protein kinase, X-linked	Cytoplasm	kinase
-0.841	PYCR2	pyrroline-5-carboxylate reductase family, member 2	Cytoplasm	enzyme
-0.279	RAB19	RAB19, member RAS oncogene family	Cytoplasm	enzyme
0.554	RABL5	RAB, member RAS oncogene family-like 5	unknown	other
0.565	RBKS	ribokinase	unknown	kinase
-0.259	RDH13	retinol dehydrogenase 13 (all-trans/9-cis)	Cytoplasm	enzyme
0.550	SCEL	sciellin	Cytoplasm	other
-0.283	SEC24A	SEC24 family, member A (S. cerevisiae)	Cytoplasm	transporter
0.459	SEC61A2	Sec61 alpha 2 subunit (S. cerevisiae)	Cytoplasm	transporter
0.554	SERPINE1	serpin peptidase inhibitor, clade E (nexin, plasminogen activator inhibitor type 1), member 1	Extracellular Space	other
-1.154	SESTD1	SEC14 and spectrin domains 1	unknown	other
0.613	SGSM1	small G protein signaling modulator 1	unknown	other
0.675	SGSM3	small G protein signaling modulator 3	unknown	other
-0.271	SLC17A5	solute carrier family 17 (anion/sugar transporter), member 5	Plasma Membrane	transporter
0.354	SLC26A10	solute carrier family 26, member 10	unknown	transporter
-1.014	SLC35F2	solute carrier family 35, member F2	unknown	other
0.597	SLC35F4	solute carrier family 35, member F4	unknown	other
-0.279	SLC37A3	solute carrier family 37 (glycerol-3-phosphate transporter), member 3	unknown	transporter
0.565	SLC4A1AP	solute carrier family 4 (anion exchanger), member 1, adaptor protein	Cytoplasm	transporter
-1.006	SLIT2	slit homolog 2 (Drosophila)	Extracellular Space	other
-0.370	SPINK2	serine peptidase inhibitor, Kazal type 2 (acrosin-trypsin inhibitor)	Extracellular Space	other
0.587	STK33	serine/threonine kinase 33	unknown	kinase
-0.502	STOML3	stomatin (EPB72)-like 3	Plasma Membrane	other
0.462	SUN1	Sad1 and UNC84 domain containing 1	Nucleus	other
0.565	SUPT7L	suppressor of Ty 7 (S. cerevisiae)-like	Nucleus	other
-1.134	TAF2	TAF2 RNA polymerase II, TATA box binding protein (TBP)-associated factor, 150kDa	Nucleus	transcription regulator
0.718	TAS2R38	taste receptor, type 2, member 38	Plasma Membrane	G-protein coupled receptor
0.613	TMEM211	transmembrane protein 211	unknown	other
0.570	TPD52L1	tumor protein D52-like 1	Cytoplasm	other
0.554	TRIM56	tripartite motif-containing 56	unknown	other
0.354	TSFM (includes EG:10102)	Ts translation elongation factor, mitochondrial	Cytoplasm	translation regulator
0.354	TSPAN31	tetraspanin 31	Plasma Membrane	other
-0.603	UBOX5	U-box domain containing 5	Nucleus	enzyme
-0.835	ULK4	unc-51-like kinase 4 (C. elegans)	unknown	kinase
0.459	UPF2	UPF2 regulator of nonsense transcripts homolog (yeast)	Cytoplasm	other
0.554	VGF	VGF nerve growth factor inducible	Extracellular Space	growth factor
-0.447	WDFY2	WD repeat and FYVE domain containing 2	unknown	other
0.476	WNT4	wingless-type MMTV integration site family, member 4	Extracellular Space	other
0.530	ZNF331	zinc finger protein 331	Nucleus	other
0.565	ZNF512	zinc finger protein 512	Nucleus	other
0.530	ZNF761	zinc finger protein 761	unknown	other
0.530	ZNF813	zinc finger protein 813	unknown	other
0.554	ZNHIT1	zinc finger, HIT type 1	unknown	other
Yellow: the gene invovling in top network see Figure 2
