# Supplementary material for: Detection of Copy Number Variants Reveals Association of Cilia Genes with Neural Tube Defects
Source: PLoS One. 2013 Jan 17;8(1):e54492. doi: 10.1371/journal.pone.0054492 (PMC3547935; doi:10.1371/journal.pone.0054492)
Supplement: Table S5 — Known candidate gene list of human/mouse NTDs. (XLS) [file pone.0054492.s006.xls]

## Sheet: Table S5
Supplementary Table 5: Known candidate genes list of human/mouse NTDs
Symbol	Reference	Affected homolgous gene in NTD-affected embryos	CNV size	Entrez Gene Name	Location	Gene Type(s)
ABI2	3			abl-interactor 2	Cytoplasm	other
ABL1	3			c-abl oncogene 1, receptor tyrosine kinase	Nucleus	kinase
AHCY	1			adenosylhomocysteinase	Cytoplasm	enzyme
ALDH1A2	1,4			aldehyde dehydrogenase 1 family, member A2	Cytoplasm	enzyme
ALDH1L1	1			aldehyde dehydrogenase 1 family, member L1	Cytoplasm	enzyme
ALDH1A7	2,3			aldehyde dehydrogenase 1 family, member A7	Cytoplasm	enzyme
ALX1	3,5			ALX homeobox 1	Nucleus	transcription regulator
AMD1	1			adenosylmethionine decarboxylase 1	unknown	enzyme
APAF1	5			apoptotic peptidase activating factor 1	Cytoplasm	other
APEX1	1,4			APEX nuclease (multifunctional DNA repair enzyme) 1	Nucleus	enzyme
APOB	3,5			apolipoprotein B (including Ag(x) antigen)	Extracellular Space	transporter
ARNT	3			aryl hydrocarbon receptor nuclear translocator	Nucleus	transcription regulator
AXD	5			axial defects
AXIN1	3,5			axin 1	Cytoplasm	other
BBS4	5			Bardet-Biedl syndrome 4	Cytoplasm	other
BCL10	5			B-cell CLL/lymphoma 10	Cytoplasm	transcription regulator
BHMT	1,2			betaine-homocysteine methyltransferase	Cytoplasm	enzyme
BHMT2	1			betaine-homocysteine methyltransferase 2	Cytoplasm	enzyme
BMP4	2,4			bone morphogenetic protein 4	Extracellular Space	growth factor
BRCA1	1,2,3,4,5			breast cancer 1, early onset	Nucleus	transcription regulator
CALR	5	CALR3	36kb	calreticulin	Cytoplasm	transcription regulator
CASP3	5			caspase 3, apoptosis-related cysteine peptidase	Cytoplasm	peptidase
CASP9	5			caspase 9, apoptosis-related cysteine peptidase	Cytoplasm	peptidase
CAT	1			catalase	Cytoplasm	enzyme
CBS	1,2			cystathionine-beta-synthase	Cytoplasm	enzyme
CECR2	5			cat eye syndrome chromosome region, candidate 2	Nucleus	other
CFL1	1			cofilin 1 (non-muscle)	Nucleus	other
CHKA	1			choline kinase alpha	Cytoplasm	kinase
CITED2	1,4			Cbp/p300-interacting transactivator, with Glu/Asp-rich carboxy-terminal domain, 2	Nucleus	transcription regulator
COBL	5			cordon-bleu homolog (mouse)	unknown	other
COQ3	1			coenzyme Q3 homolog, methyltransferase (S. cerevisiae)	Cytoplasm	enzyme
CRABP1	1,2,4			cellular retinoic acid binding protein 1	Cytoplasm	transporter
CRABP2	1,2,4			cellular retinoic acid binding protein 2	Cytoplasm	transporter
CREBBP	3			CREB binding protein	Nucleus	transcription regulator
CSK	2,3,4			c-src tyrosine kinase	Cytoplasm	kinase
CTH	1			cystathionase (cystathionine gamma-lyase)	Cytoplasm	enzyme
CTNNBIP1	5	CTNNA3	299kb	catenin, beta interacting protein 1	Cytoplasm	other
CUBN	1			cubilin (intrinsic factor-cobalamin receptor)	Plasma Membrane	transmembrane receptor
CYP26A1	1,2,4,5			cytochrome P450, family 26, subfamily A, polypeptide 1	Cytoplasm	enzyme
CYP26B1	1,2,4,5	CYP27B1	279kb	cytochrome P450, family 26, subfamily B, polypeptide 1	Cytoplasm	enzyme
CYCS (includes EG:13063)	5			Apoptosis	Mouse, Rat
DBF	3,5			doublefoot
DEAF1	5			deformed epidermal autoregulatory factor 1 (Drosophila)	Nucleus	transcription regulator
DHFR	1			dihydrofolate reductase	unknown	enzyme
DLX5	3,5			distal-less homeobox 5	Nucleus	transcription regulator
DNMT3B	3,5			DNA (cytosine-5-)-methyltransferase 3 beta	Nucleus	enzyme
DS	3,5			disorganization
DVL2	2,5			dishevelled, dsh homolog 2 (Drosophila)	Cytoplasm
DVL3	4			dishevelled, dsh homolog 3 (Drosophila)	Cytoplasm	other
EFNA5	5			ephrin-A5	Plasma Membrane	kinase
ENAH	5			enabled homolog (Drosophila)	Cytoplasm	other
EP300	3,5			E1A binding protein p300	Nucleus	transcription regulator
EPHA7	5			EPH receptor A7	Plasma Membrane	kinase
EPOR	5			erythropoietin receptor	Plasma Membrane	transmembrane receptor
ERCC2	1,4			excision repair cross-complementing rodent repair deficiency, complementation group 2	Nucleus	enzyme
FGFR1	3,5			fibroblast growth factor receptor 1	Plasma Membrane	kinase
FKBP1A	5			FK506 binding protein 1A, 12kDa	Cytoplasm	enzyme
FKBP8	5			FK506 binding protein 8, 38kDa	Cytoplasm	other
FOLH1	1,2			folate hydrolase (prostate-specific membrane antigen) 1	Plasma Membrane	peptidase
FOLR1	1,2,3,5			folate receptor 1 (adult)	Plasma Membrane	transporter
FOLR2	1,2			folate receptor 2 (fetal)	Plasma Membrane	transporter
FOLR3	1			folate receptor 3 (gamma)	Extracellular Space	other
FOXB1	3,5			forkhead box B1	Nucleus	transcription regulator
FPGS	1			folylpolyglutamate synthase	Cytoplasm	enzyme
FREM1	5			FRAS1 related extracellular matrix 1	Extracellular Space	other
FREM2	5			FRAS1 related extracellular matrix protein 2	unknown	other
FTCD	1			formiminotransferase cyclodeaminase	Cytoplasm	enzyme
FZD3	5			frizzled homolog 3 (Drosophila)	Plasma Membrane	G-protein coupled receptor
GADD45A	3,5			growth arrest and DNA-damage-inducible, alpha	Nucleus	other
GAMT	1			guanidinoacetate N-methyltransferase	Cytoplasm	enzyme
GAPDH (includes EG:2597)	1
GART	1			phosphoribosylglycinamide formyltransferase, phosphoribosylglycinamide synthetase, phosphoribosylaminoimidazole synthetase	Cytoplasm	enzyme
GGH	1			gamma-glutamyl hydrolase (conjugase, folylpolygammaglutamyl hydrolase)	Cytoplasm	peptidase
GJA1	3,5			gap junction protein, alpha 1, 43kDa	Plasma Membrane	transporter
GJA5	5			gap junction protein, alpha 5, 40kDa	Plasma Membrane	transporter
GLI3	3,5			GLI family zinc finger 3	Nucleus	transcription regulator
GRHL3	5			grainyhead-like 3 (Drosophila)	unknown	other
GRIP1	5			glutamate receptor interacting protein 1	Plasma Membrane	other
GRLF1	5			glucocorticoid receptor DNA binding factor 1	Nucleus	transcription regulator
GTF2I	5			general transcription factor IIi	Nucleus	transcription regulator
GTF2IRD1	5			GTF2I repeat domain containing 1	Nucleus	transcription regulator
HDAC4	5			histone deacetylase 4	Nucleus	transcription regulator
HES1	3,5			hairy and enhancer of split 1, (Drosophila)	Nucleus	transcription regulator
HIC1	5			hypermethylated in cancer 1	Nucleus	transcription regulator
HK1	1			hexokinase 1	Cytoplasm	kinase
HOXA	4			homeobox A	Nucleus	transcription regulator
HOXB	4			homeobox B	Nucleus	transcription regulator
HOXC	4			homeobox C	Nucleus	transcription regulator
HOXD	4			homeobox D	Nucleus	transcription regulator
HSPG2	5			BASEMENT MEMBRANE SPECIFIC HEPARAN SULFATE PROTEOGLYCAN CORE, ENDOREPELLIN, Heparan Sulfate Proteoglycan 2
ICMT	1			isoprenylcysteine carboxyl methyltransferase	Cytoplasm	enzyme
INS	1			insulin	Extracellular Space	other
INSR	1			insulin receptor	Plasma Membrane	kinase
ITGA3	3,5			integrin, alpha 3 (antigen CD49C, alpha 3 subunit of VLA-3 receptor)	Plasma Membrane	other
ITGA6	3,5			integrin, alpha 6	Plasma Membrane	other
ITGB1	3,5			integrin, beta 1 (fibronectin receptor, beta polypeptide, antigen CD29 includes MDF2, MSK12)	Plasma Membrane	transmembrane receptor
JAMD6	5			jumonji domain containing 6
JARID2	3,4,5			jumonji, AT rich interactive domain 2	Nucleus	transcription regulator
LAMA5	3,5			laminin, alpha 5	Extracellular Space	other
LEP	1			leptin	Extracellular Space	growth factor
LEPR	1			leptin receptor	Plasma Membrane	transmembrane receptor
LMO4	5	LMO1	196kb	LIM domain only 4	Nucleus	transcription regulator
LPA	3			lipoprotein, Lp(a)	Extracellular Space	other
LPAR1	5			lysophosphatidic acid receptor 1	Plasma Membrane	G-protein coupled receptor
LRP6	5			low density lipoprotein receptor-related protein 6	Plasma Membrane	transmembrane receptor
MAB21L1	4			mab-21-like 1 (C. elegans)	unknown	other
MAB21L2	4			mab-21-like 2 (C. elegans)	unknown	other
MAP3K4	5			mitogen-activated protein kinase kinase kinase 4	Cytoplasm	kinase
MAPK8	5			mitogen-activated protein kinase 8	Cytoplasm	kinase
MAPK9	5			mitogen-activated protein kinase 9	Cytoplasm	kinase
MARCKS	3			myristoylated alanine rich protein kinase C substrate	unknown
MARCKSL1	2,3,5			MARCKS-like 1	Cytoplasm	other
MAT1A	1			methionine adenosyltransferase I, alpha	Cytoplasm	enzyme
MAT2A	1			methionine adenosyltransferase II, alpha	Cytoplasm	enzyme
MEN1	5			multiple endocrine neoplasia I	Nucleus	transcription regulator
MGMT	1			O-6-methylguanine-DNA methyltransferase	Nucleus	enzyme
MSGN1	5			mesogenin 1	unknown	other
MSX1	5			msh homeobox 1	Nucleus	transcription regulator
MSX2	2,4,5			msh homeobox 2	Nucleus	transcription regulator
MTHFD1	1,2			methylenetetrahydrofolate dehydrogenase (NADP+ dependent) 1, methenyltetrahydrofolate cyclohydrolase, formyltetrahydrofolate synthetase	Cytoplasm	enzyme
MTHFD2	1			methylenetetrahydrofolate dehydrogenase (NADP+ dependent) 2, methenyltetrahydrofolate cyclohydrolase	Cytoplasm	enzyme
MTHFR	1,2			5,10-methylenetetrahydrofolate reductase (NADPH)	Cytoplasm	enzyme
MTHFS	1			5,10-methenyltetrahydrofolate synthetase (5-formyltetrahydrofolate cyclo-ligase)	Cytoplasm	enzyme
MTR	1,2			5-methyltetrahydrofolate-homocysteine methyltransferase	Cytoplasm	enzyme
MTRR	1,2			5-methyltetrahydrofolate-homocysteine methyltransferase reductase	Cytoplasm	enzyme
MTTP	5			microsomal triglyceride transfer protein	Cytoplasm	transporter
MUT	1			methylmalonyl Coenzyme A mutase	Cytoplasm	enzyme
NAP1L2	2,4,5			nucleosome assembly protein 1-like 2	Nucleus	other
NAT1	1			N-acetyltransferase 1 (arylamine N-acetyltransferase)	Cytoplasm	enzyme
NAT2	1			N-acetyltransferase 2 (arylamine N-acetyltransferase)	Cytoplasm	enzyme
NCAM1	1,2,4,5			neural cell adhesion molecule 1	Plasma Membrane	other
NEUROG2	3			neurogenin 2	Nucleus	other
NF1	3,5			neurofibromin 1	Cytoplasm	other
NNMT	1			nicotinamide N-methyltransferase	Cytoplasm	enzyme
NOG	2,3,4,5			noggin	Extracellular Space	other
NOS1	1			nitric oxide synthase 1 (neuronal)	Cytoplasm	enzyme
NOS2	1			nitric oxide synthase 2, inducible	Cytoplasm	enzyme
NOS3	1			nitric oxide synthase 3 (endothelial cell)	Cytoplasm	enzyme
NOTCH3	3			Notch homolog 3 (Drosophila)	Plasma Membrane	transcription regulator
NUP50	5			nucleoporin 50kDa	Nucleus	transporter
OGG1	1,4			8-oxoguanine DNA glycosylase	Nucleus	enzyme
PALLD	5			palladin, cytoskeletal associated protein	Cytoplasm	other
PAX1	2,4			paired box 1	Nucleus	transcription regulator
PAX2	5			paired box 2	Nucleus	transcription regulator
PAX3	2,3,4,5			paired box 3	Nucleus	transcription regulator
PAX7	2,4			paired box 7	Nucleus	transcription regulator
PAX8	2,4			paired box 8	Nucleus	transcription regulator
PAX9	4			paired box 9	Nucleus	transcription regulator
PCMT1	1			protein-L-isoaspartate (D-aspartate) O-methyltransferase	Cytoplasm	enzyme
PCYT1A	1			phosphate cytidylyltransferase 1, choline, alpha	Cytoplasm	enzyme
PDGFRA	1,2,4			platelet-derived growth factor receptor, alpha polypeptide	Plasma Membrane	kinase
PEMT	1			phosphatidylethanolamine N-methyltransferase	Cytoplasm	enzyme
PFN1	5			profilin 1	Cytoplasm	other
PIGA	5			phosphatidylinositol glycan anchor biosynthesis, class A	Cytoplasm	enzyme
PITX2	5			paired-like homeodomain 2	Nucleus	transcription regulator
POR	5			P450 (cytochrome) oxidoreductase	Cytoplasm	enzyme
PRKACA	1,4,5			protein kinase, cAMP-dependent, catalytic, alpha	Cytoplasm	kinase
PRKACB	1,4,5			protein kinase, cAMP-dependent, catalytic, beta	Cytoplasm	kinase
PRMT1	1			protein arginine methyltransferase 1	Nucleus	enzyme
PRMT2	1			protein arginine methyltransferase 2	Nucleus	enzyme
PTCH1	3,5			patched homolog 1 (Drosophila)	Plasma Membrane	transmembrane receptor
PTPN11	5			protein tyrosine phosphatase, non-receptor type 11	Cytoplasm	phosphatase
PTPN9	5			protein tyrosine phosphatase, non-receptor type 9	Cytoplasm	phosphatase
P38IP	5			P38-interacting protein
RAB23	3,5	RAB19,RABL5	165kb,775kb	RAB23, member RAS oncogene family	Cytoplasm	enzyme
RARA	3,5			retinoic acid receptor, alpha	Nucleus	ligand-dependent nuclear receptor
RARG	3,5			retinoic acid receptor, gamma	Nucleus	ligand-dependent nuclear receptor
RGMA	5			RGM domain family, member A	Plasma Membrane	other
RNMT	1			RNA (guanine-7-) methyltransferase	Nucleus	enzyme
RPL24	5			ribosomal protein L24	Cytoplasm	other
RYBP	5			RING1 and YY1 binding protein	Nucleus	transcription regulator
SALL4	5			sal-like 4 (Drosophila)	Nucleus	transcription regulator
SALL1	5			sal-like 1 (Drosophila)	Nucleus	transcription regulator
SARDH	1			sarcosine dehydrogenase	Cytoplasm	enzyme
SHH	2,3,4			sonic hedgehog homolog (Drosophila)	Extracellular Space	peptidase
SHMT2	1,2			serine hydroxymethyltransferase 2 (mitochondrial)	Cytoplasm	enzyme
SHROOM3	3,5			shroom family member 3	Cytoplasm	other
SIRT1	5			sirtuin (silent mating type information regulation 2 homolog) 1 (S. cerevisiae)	Nucleus	transcription regulator
SKI	3,5			v-ski sarcoma viral oncogene homolog (avian)	Nucleus	other
SLC19A1	1,2	SLC17A5,	530kb	solute carrier family 19 (folate transporter), member 1	Plasma Membrane	transporter
SLC2A1	1	SLC35F2, SLC35F4	104kb, 310kb	solute carrier family 2 (facilitated glucose transporter), member 1	Plasma Membrane	transporter
SLC2A4	1	SLC37A3,SLC4A1A	615kb, 454kb	solute carrier family 2 (facilitated glucose transporter), member 4	Plasma Membrane	transporter
SMAD5	3			SMAD family member 5	Nucleus	transcription regulator
SMARCA4	5			SWI/SNF related, matrix associated, actin dependent regulator of chromatin, subfamily a, member 4	Nucleus	transcription regulator
SMARCC1	5			SWI/SNF related, matrix associated, actin dependent regulator of chromatin, subfamily c, member 1	Nucleus	transcription regulator
SNAI2	2,4			snail homolog 2 (Drosophila)	Nucleus	other
SNX1	5			sorting nexin 1	Cytoplasm	transporter
SNX2	5			sorting nexin 2	Cytoplasm	transporter
SOBP	5			sine oculis binding protein homolog (Drosophila)	unknown	other
SOD2	1			superoxide dismutase 2, mitochondrial	Cytoplasm	enzyme
SP8	5			Sp8 transcription factor	Nucleus	other
T	1,2,3,4,5			T, brachyury homolog (mouse)	Nucleus	transcription regulator
TCN2	1,2			transcobalamin II; macrocytic anemia	Extracellular Space	transporter
TERC	2,3,4,5
TCOF1	5			Treacher Collins-Franceschetti syndrome 1	Nucleus	transporter
TFAP2A	2,3,4,5			transcription factor AP-2 alpha (activating enhancer binding protein 2 alpha)	Nucleus	transcription regulator
TP53	1,3,5			tumor protein p53	Nucleus	transcription regulator
TRAF4	5			TNF receptor-associated factor 4	Cytoplasm	other
TRAF6	5			TNF receptor-associated factor 6	Cytoplasm	enzyme
TRDMT1	1			tRNA aspartic acid methyltransferase 1	Nucleus	enzyme
TRPM6	5			transient receptor potential cation channel, subfamily M, member 6	Plasma Membrane	kinase
TS	3,5			tail-short	unknown
TSC2	3			tuberous sclerosis 2	Cytoplasm	other
TULP3	5			tubby like protein 3	unknown	other
TWIST1	3			twist homolog 1 (Drosophila)	Nucleus	transcription regulator
TXN2	1			thioredoxin 2	Cytoplasm	enzyme
TYMS	1			thymidylate synthetase	Nucleus	enzyme
UCP2	1,2			uncoupling protein 2 (mitochondrial, proton carrier)	Cytoplasm	transporter
VANGL1	1,4			vang-like 1 (van gogh, Drosophila)	Cytoplasm	other
VANGL2	1,4			vang-like 2 (van gogh, Drosophila)	Plasma Membrane	other
VASP	5			vasodilator-stimulated phosphoprotein	Plasma Membrane	other
VCL	3			vinculin	Plasma Membrane	enzyme
WNT3A	5	WNT4	177kb	wingless-type MMTV integration site family, member 3A	Extracellular Space	other
XRCC1	1,4			X-ray repair complementing defective repair in Chinese hamster cells 1	Nucleus	other
XRCC2	5			X-ray repair complementing defective repair in Chinese hamster cells 2	Nucleus	enzyme
XRCC3	1,4			X-ray repair complementing defective repair in Chinese hamster cells 3
YBX1	5			Y box binding protein 1	Nucleus	transcription regulator
YY1	5			YY1 transcription factor	Nucleus	transcription regulator
ZEB1	5			zinc finger E-box binding homeobox 1	Nucleus	transcription regulator
ZIC1	1,4	ZNF331	132kb	Zic family member 1 (odd-paired homolog, Drosophila)	Nucleus	transcription regulator
ZIC2	1,2,4	ZNF813	132kb	Zic family member 2 (odd-paired homolog, Drosophila)	Nucleus	transcription regulator
ZIC3	1,2,4	ZNF512	454kb	Zic family member 3 (odd-paired homolog, Drosophila)	Nucleus	other
ZIC5	5	ZNF761	132kb	Zic family member 5 (odd-paired homolog, Drosophila)	Nucleus	other
		GLIS3	107kb
Yellow: the homologous gene identified from NTD-specific CNVs in our study.
References
1. Greene ND, Stanier P, Copp AJ. (2009). Genetics of human neural tube defects. Hum Mol Genet 18:R113-129.
2. Boyles AL, Hammock P, Speer MC. (2005) Candidate gene analysis in human neural tube defects. Am J Med Genet C Semin Med Genet 135C:9-23.
3. Juriloff DM, Harris MJ. (2000) Mouse models for neural tube closure defects. Hum Mol Genet 9:993-1000.
4. Kibar Z, Capra V, Gros P. (2007) Toward understanding the genetic basis of neural tube defects. Clin Genet 71:295-310.
5. Harris MJ, Juriloff DM. (2007) Mouse mutants with neural tube closure defects and their role in understanding human neural tube defects. Birth Defects Res A Clin Mol Teratol 79:187-210.
