# Supplementary material for: Detection of Copy Number Variants Reveals Association of Cilia Genes with Neural Tube Defects
Source: PLoS One. 2013 Jan 17;8(1):e54492. doi: 10.1371/journal.pone.0054492 (PMC3547935; doi:10.1371/journal.pone.0054492)
Supplement: Table S6 — Primers and enzymes of MKS1/MKS3 PCR-sequencing. (XLS) [file pone.0054492.s007.xls]

## Sheet: Table S6
Supplementary Table 6 Primers and enzymes of MKS1/MKS3 PCR-sequencing
Primer for exon	sequences (5'to3')	PCR size	PCR enzyme	Cat.number, Company
mks3-EXON1-F	acttgggttgtccaatcagc	353	Platinum® Taq DNA Polymerase	cat. 10966, Invitrogen
mks3-EXON1-R	aggcgggagtgttacttttg
mks3-EXON2-F	ccagaatcctgctgttaatcac	381	Platinum® Taq DNA Polymerase	cat. 10966, Invitrogen
mks3-EXON2-R	ttcgctgatctcccaaaact
mks3-EXON3-F	tggcattttgaacttacatgatt	245	Platinum® Taq DNA Polymerase	cat. 10966, Invitrogen
mks3-EXON3-R	tgcccttttcaaataaaaacaaa
mks3-EXON4-isoform-F	ccaccacacctggctaattt	225	Platinum® Taq DNA Polymerase	cat. 10966, Invitrogen
mks3-EXON4-isoform-R	cctgccttcatatccctcag
mks3-EXON4-F	ttgggttttgttaaatattttctga	289	Platinum® Taq DNA Polymerase	cat. 10966, Invitrogen
mks3-EXON4-R	tgtgaaaactaagtgatatgataggaa
mks3-EXON5-6-F	tccattgtttagaaagacagctttt	417	Platinum® Taq DNA Polymerase	cat. 10966, Invitrogen
mks3-EXON5-6-R	caaaagggtttctcattctagcc
mks3-EXON7-F	tgagacatttcccattcaaca	206	Platinum® Taq DNA Polymerase	cat. 10966, Invitrogen
mks3-EXON7-R	tctgggtaaataaatggtataattctt
mks3-EXON8-9F	tggaacagacctgcacaaag	579	Platinum® Taq DNA Polymerase	cat. 10966, Invitrogen
mks3-EXON8-9-R	ccaacaacctaaaaaggcaag
mks3-EXON10-F	tcagagtatttgacctgattttgc	200	Platinum® Taq DNA Polymerase	cat. 10966, Invitrogen
mks3-EXON10-R	tcttttcctcttggctttgtc
mks3-EXON11-F	atccatgttcgggtttgaga	219	Platinum® Taq DNA Polymerase	cat. 10966, Invitrogen
mks3-EXON11-R	attccaattactgctgacatga
mks3-EXON12-F	aagttgctgttttatgtgctttt	239	Platinum® Taq DNA Polymerase	cat. 10966, Invitrogen
mks3-EXON12-R	ctgctcagggaaaagagtgg
mks3-EXON13-F	ttgcagccatcttatctaaaaca	265	Platinum® Taq DNA Polymerase	cat. 10966, Invitrogen
mks3-EXON13-R	atgactggcaaacacttcca
mks3-EXON14-F	aaaggcccggatatactgatt	235	Platinum® Taq DNA Polymerase	cat. 10966, Invitrogen
mks3-EXON14-R	tgtcttttgaccaaaatgtaaactg
mks3-EXON15-F	tggtaaaacccagctacaaatg	270	Platinum® Taq DNA Polymerase	cat. 10966, Invitrogen
mks3-EXON15-R	attaggggagtctggggaaa
mks3-EXON16-F	tgtttttgaacaccgatgaca	220	Platinum® Taq DNA Polymerase	cat. 10966, Invitrogen
mks3-EXON16-R	tgagaaggatccagaatggtc
mks3-EXON17-F	ggcttcaggcttaagaaatgg	341	Platinum® Taq DNA Polymerase	cat. 10966, Invitrogen
mks3-EXON17-R	gaatggggagttgggaactt
mks3-EXON18-F	agaccctcctttcccaaaaa	233	Platinum® Taq DNA Polymerase	cat. 10966, Invitrogen
mks3-EXON18-R	agcaggccttttaaatttgg
mks3-EXON19-20-F	cgctggtactttttcaggtg	470	Platinum® Taq DNA Polymerase	cat. 10966, Invitrogen
mks3-EXON19-20-R	ccactgtcatgaaaacttagttgg
mks3-EXON21-F	ttttctttatccatgtccgttt	250	Platinum® Taq DNA Polymerase	cat. 10966, Invitrogen
mks3-EXON21-R	ggcagagttataaagaagcaatg
mks3-EXON22-F	cactgtgcttttggttggaa	300	Platinum® Taq DNA Polymerase	cat. 10966, Invitrogen
mks3-EXON22-R	tggcccaaaaattcaatcat
mks3-EXON23-F	ttgttttgcagatgagttgct	230	Platinum® Taq DNA Polymerase	cat. 10966, Invitrogen
mks3-EXON23-R	tccagcatttataagaatccacttc
mks3-EXON24-25-F	ttttctttttgaggcaggaaa	511	Platinum® Taq DNA Polymerase	cat. 10966, Invitrogen
mks3-EXON24-25-R	ggtcttaaggtgggggttct
mks3-EXON26-F	ttttcattttctctcctgctga	224	Platinum® Taq DNA Polymerase	cat. 10966, Invitrogen
mks3-EXON26-R	tcaagttctacaaagggatttagaag
mks3-EXON27-F	catccagattttgtcaccagaa	275	Platinum® Taq DNA Polymerase	cat. 10966, Invitrogen
mks3-EXON27-R	tctctcaagaaaatgaaggaaaatg
mks3-EXON28-F	tcgacgtgcatatttaattctgtt	225	Platinum® Taq DNA Polymerase	cat. 10966, Invitrogen
mks3-EXON28-R	aaaaatatggcaaactaacctga
mks3-EXON29-F	ctcaagcagtcctccacctc	478	Platinum® Taq DNA Polymerase	cat. 10966, Invitrogen
mks3-EXON29-R	ccacaggggtgttgtcttct
mks1-EXON1-F	ctgcacttgcactgtgtgg	306	Platinum® Taq DNA Polymerase,PCRx Enhancer System	cat. 10966, cat. 11495-017, Invitrogen
mks1-EXON1-R	cgagctcaggttggaatgat
mks1-EXON2-F	ggcaaccctacctcctctgt	233	Platinum® Taq DNA Polymerase	cat. 10966, Invitrogen
mks1-EXON2-R	gcacatcaccaccgtaacac
mks1-EXON3-F	aagaagtggtgctggtttgg	218	Platinum® Taq DNA Polymerase	cat. 10966, Invitrogen
mks1-EXON3-R	cctgtctggaaatcactttgg
mks1-EXON4-F	gttcccctgccattcattag	353	Platinum® Taq DNA Polymerase	cat. 10966, Invitrogen
mks1-EXON4-R	gaggaagcaaagatggaagc
mks1-EXON5-F	cctggatgaggtttcaggag	229	Platinum® Taq DNA Polymerase	cat. 10966, Invitrogen
mks1-EXON5-R	taaaagcttgtcccccatcc
mks1-EXON6-F	cccattctgaagtggctctc	315	Platinum® Taq DNA Polymerase	cat. 10966, Invitrogen
mks1-EXON6-R	aaagtccctccctcccctat
mks1-EXON7-F	cttgtttccctgaaggacca	314	Platinum® Taq DNA Polymerase	cat. 10966, Invitrogen
mks1-EXON7-R	ggccctatgacttggaacag
mks1-EXON8-F	cagggcccatctctcattat	206	Platinum® Taq DNA Polymerase	cat. 10966, Invitrogen
mks1-EXON8-R	tgaggctcatcccttggata
mks1-EXON9-F	tttggtctagcttgggttgc	167	Platinum® Taq DNA Polymerase	cat. 10966, Invitrogen
mks1-EXON9-R	agtcagaatgctccggctaa
mks1-EXON10-F	gatttgtagatggggctgga	165	Platinum® Taq DNA Polymerase	cat. 10966, Invitrogen
mks1-EXON10-R	cacgtgcctaagcatcaaga
mks1-EXON11-F	ttgggtgctaagggtggtag	192	Platinum® Taq DNA Polymerase	cat. 10966, Invitrogen
mks1-EXON11-R	agcctgaccaaatgcctcta
mks1-EXON12-F	tttctgaatgacttgctttcctc	217	Platinum® Taq DNA Polymerase	cat. 10966, Invitrogen
mks1-EXON12-R	cacagcacttggcctgataa
mks1-EXON13-14-F	cttgcccaccctatgacact	395	Platinum® Taq DNA Polymerase	cat. 10966, Invitrogen
mks1-EXON13-14-R	cctcaccagaagcattcgag
mks1-EXON15-F	attgctggggagtcagtgag	238	Platinum® Taq DNA Polymerase	cat. 10966, Invitrogen
mks1-EXON15-R	cagcgtgaagtcactccaaa
mks1-EXON16-17-F	gggaataagaatgggggtga	414	Platinum® Taq DNA Polymerase	cat. 10966, Invitrogen
mks1-EXON16-17-R	gcactgcagagagaaacagg
mks1-EXON18-F	catgggcctgtttctctctg	214	Platinum® Taq DNA Polymerase	cat. 10966, Invitrogen
mks1-EXON18-R	atcccccatcttgtcctctt
